# Supplementary material
Source: PubMed Central journal article supplement (PMC8179143)
Supplement: pnas.2025759118.sapp.pdf [file pnas.2025759118.sapp.pdf]

## Supplemental Information:

### *A liposome-displayed hemagglutinin vaccine platform protects mice and ferrets from heterologous influenza virus challenge*

Zachary R. Sia, Xuedan He, Ali Zhang, Jann C. Ang, Shuai Shao, Amal Seffouh, Wei-Chiao Huang, Michael R. D'Agostino, Amir Teimouri Dereshgi, Suryaprakash Sambhara, Joaquin Ortega, Hanne Anderson, Matthew S. Miller, Bruce A. Davidson, Jonathan F. Lovell

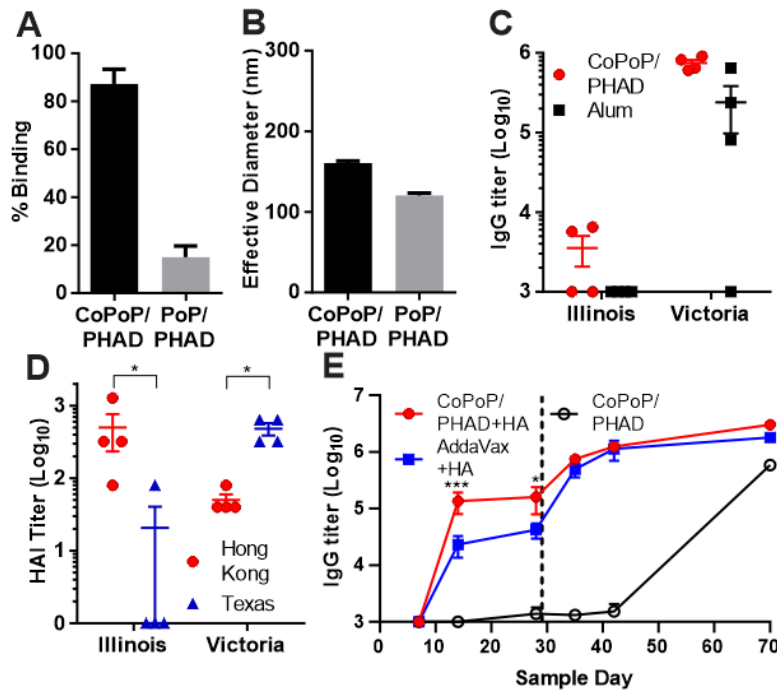

**Supplemental Figure 1. H3 antigen for ferret vaccination.** (A) H3 from Victoria strain achieves CoPoP binding consistent with H3 from Illinois strain. (B) Average particle size also remains consistent with a homogenous solution without aggregates. (A-B) Represent data as mean  $\pm$  s.d. from  $n = 3$  samples. (C) IgG ELISA assay was used to compare heterologous strain-antibody binding potential between H3 strains. Plates were coated using the antigen from the Victoria strain then serum from mice vaccinated with the heterologous Hong Kong or homologous Victoria HA were introduced. Antibodies against Hong Kong strain show little binding affinity for HA antigen of Victoria strain. (D) CoPoP formulation with H3 from Victoria strain resulted in significantly higher HA inhibition of A/Texas/50/2012 virus than H3 from Hong Kong strains. (E) IgG titers in the serum of challenged ferrets was assessed at time points before and after the challenge virus inoculation (date indicated by dotted line). All vaccinations in mice performed with 100 ng doses of antigen. (C, D) Statistical analysis by unpaired t tests, (E) by one-way ANOVA of CoPoP/PHAD+HA against AddaVax+HA,  $n = 6$ . IgG and HAI titers expressed as mean  $\pm$  s.e.m (\*indicates  $p < 0.05$ , \*\*indicates  $p < 0.01$ , \*\*\*indicates  $p < 0.005$ ).

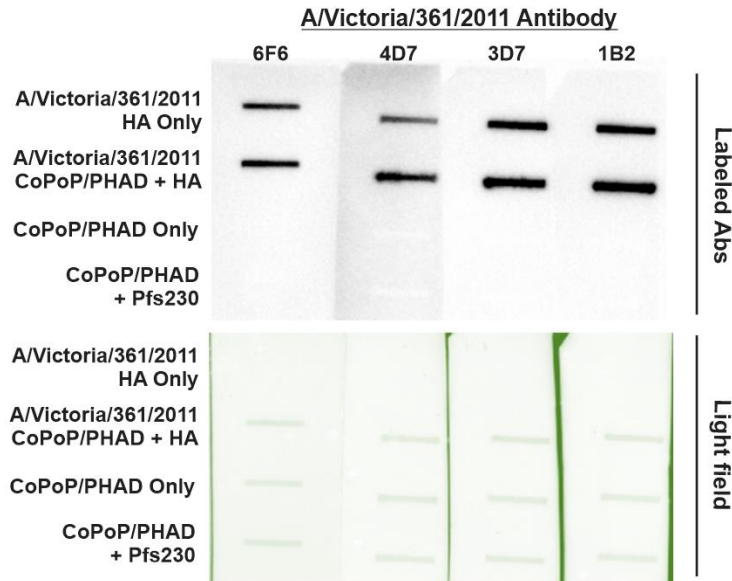

**Supplemental Figure 2. Slot blot for A/Victoria/361/2011 HA using HA monoclonal antibodies.** Monoclonal antibodies against A/Victoria/361/2011 from clones 6F6, 4D7, 3D7, and 1B2 were tested against both soluble or liposome-bound HA antigen. Qualitative assessment of band weight indicates that labeled antibody binding between soluble antigen and liposome-bound antigen is comparable across four binding epitopes, and liposomes lacking or bearing irrelevant antigens do not bind with these antibodies. Light field images confirm the presence of CoPoP/PHAD liposomes in the imaged samples. Pfs230 served as an irrelevant control antigen.

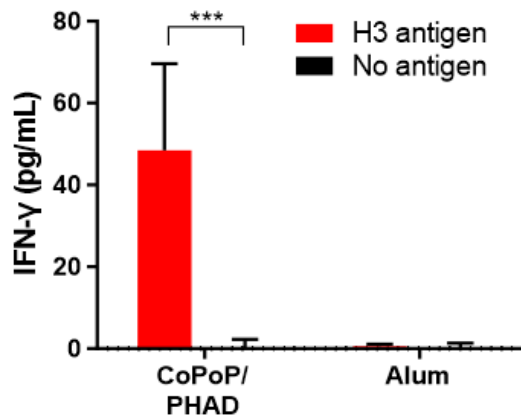

**Supplemental Figure 3. IFN-γ measured in splenocytes.** Mice vaccinated with CoPoP/PHAD + His-tagged H3 antigen from A/canine/Illinois/11613/2015 H3N2 yielded observable IFN-γ with splenocyte restimulation with H3, while no IFN-γ was detected in splenocytes from mice vaccinated with H3 and alum. A immunization dose of 100 ng of antigen was used. (\*\*\*) indicates p < 0.005).

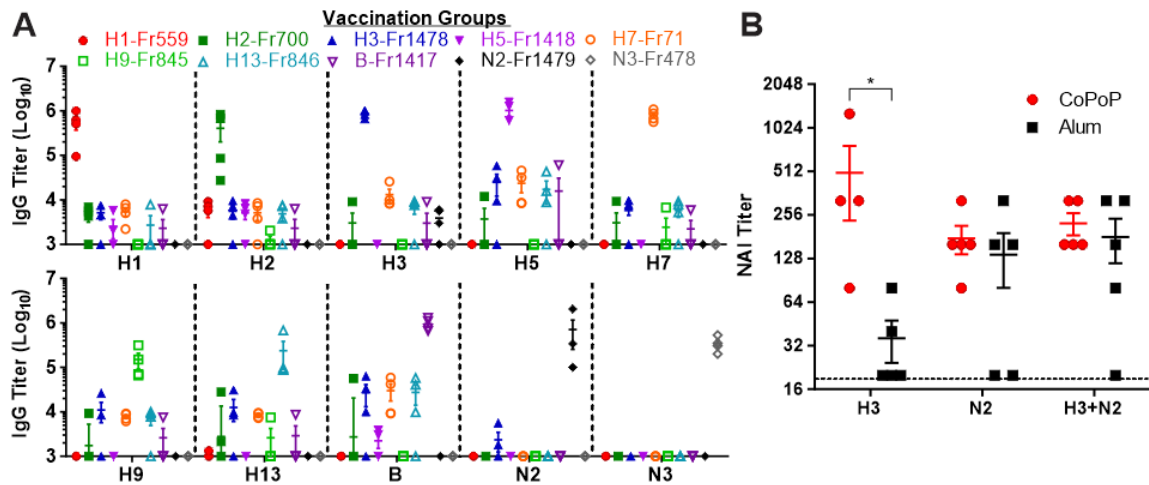

**Supplemental Figure 4. Additional multiplex data.** (A) When nanoliposomes were loaded with 50 ng of a single antigen type, the resulting antibody response showed strong binding (average greater than  $10^5$ ) to only the matched antigen, with a maximum heterologous binding titer of less than  $10^4$ . (B) Assessment of NAI by ELLA assay yielded detectable NA inhibitory titers in each sample group, with CoPoP/PHAD yielding detectable titers in all sample groups. IgG and NAI titers expressed as mean  $\pm$  s.e.m (\*indicates  $p < 0.05$ )

**Supplemental Table 1: Head sequence identity of various trimeric HA antigens and challenge strains.**

| Head Region - % Protein Sequence Identity |           |          |        |       |           |          |             |          | Challenge Strain Identity |            |
|-------------------------------------------|-----------|----------|--------|-------|-----------|----------|-------------|----------|---------------------------|------------|
| H3 Antigen                                | Hiroshima | Brisbane | Hawaii | Perth | Wisconsin | Victoria | Switzerland | Illinois | Hong Kong/1968            | Texas/2012 |
| Hiroshima/2005                            |           | 98.23    | 95.58  | 95.58 | 81.42     | 95.58    | 92.92       | 76.11    | 77.43                     | 95.13      |
| Brisbane/2007                             | 98.23     |          | 97.35  | 97.35 | 82.3      | 97.35    | 94.69       | 76.11    | 77.43                     | 96.02      |
| Hawaii/2009                               | 95.58     | 97.35    |        | 99.12 | 82.74     | 97.35    | 94.69       | 76.11    | 77.43                     | 96.02      |
| Perth/2009                                | 95.58     | 97.35    | 99.12  |       | 82.74     | 97.35    | 94.69       | 75.66    | 76.99                     | 96.02      |
| Wisconsin/2010                            | 81.42     | 82.3     | 82.74  | 82.74 |           | 81.42    | 80.53       | 75.22    | 76.99                     | 80.09      |
| Victoria/2011                             | 95.58     | 97.35    | 97.35  | 97.35 | 81.42     |          | 97.35       | 74.78    | 76.11                     | 98.23      |
| Switzerland/2013                          | 92.92     | 94.69    | 94.69  | 94.69 | 80.53     | 97.35    |             | 74.78    | 76.11                     | 96.02      |
| Illinois/2015                             | 76.11     | 76.11    | 76.11  | 75.66 | 75.22     | 74.78    | 74.78       |          | 91.59                     | 74.34      |

**Supplemental Table 2: Stalk sequence identity of various trimeric HA antigens and challenge strains.**

| Stalk Region - % Protein Sequence Identity |           |          |        |       |           |          |             |          | Challenge Strain Identity |            |
|--------------------------------------------|-----------|----------|--------|-------|-----------|----------|-------------|----------|---------------------------|------------|
| H3 Antigen                                 | Hiroshima | Brisbane | Hawaii | Perth | Wisconsin | Victoria | Switzerland | Illinois | Hong Kong/1968            | Texas/2012 |
| Hiroshima/2005                             |           | 98.23    | 98.2   | 97.87 | 94.24     | 97.12    | 96.04       | 89.21    | 93.5                      | 96.04      |
| Brisbane/2007                              | 98.23     |          | 99.64  | 99.29 | 93.88     | 98.56    | 97.48       | 90.29    | 94.58                     | 97.48      |

|                  |       |       |       |       |       |       |       |       |       |       |
|------------------|-------|-------|-------|-------|-------|-------|-------|-------|-------|-------|
| Hawaii/2009      | 98.2  | 99.64 |       | 100   | 93.88 | 98.92 | 97.84 | 90.29 | 94.58 | 98.19 |
| Perth/2009       | 97.87 | 99.29 | 100   |       | 93.88 | 98.92 | 97.84 | 90.29 | 94.58 | 98.19 |
| Wisconsin/2010   | 94.24 | 93.88 | 93.88 | 93.88 |       | 92.81 | 91.73 | 90.65 | 94.22 | 92.06 |
| Victoria/2011    | 97.12 | 98.56 | 98.92 | 98.92 | 92.81 |       | 98.92 | 89.93 | 93.5  | 99.28 |
| Switzerland/2013 | 96.04 | 97.48 | 97.84 | 97.84 | 91.73 | 98.92 |       | 89.93 | 92.78 | 99.64 |
| Illinois/2015    | 89.21 | 90.29 | 90.29 | 90.29 | 90.65 | 89.93 | 89.93 |       | 94.22 | 89.53 |

**Supplemental Table 3: Statistical analysis of challenge studies shown in Figure 3.**

| Figure 3A Comparisons                            | Day 1  | Day 2  | Day 3  | Day 4         | Day 5            | Day 6            | Day 7            | Day 8            |
|--------------------------------------------------|--------|--------|--------|---------------|------------------|------------------|------------------|------------------|
| <b>Tukey's multiple comparisons (p values)</b>   |        |        |        |               |                  |                  |                  |                  |
| CoPoP/PHAD vs. CoPoP                             | 0.9987 | 0.9317 | 0.7951 | 0.2214        | <b>*0.0144</b>   | <b>*0.0317</b>   | 0.1149           | 0.2375           |
| CoPoP/PHAD vs. Alum                              | 0.953  | 0.5343 | 0.4953 | 0.073         | <b>***0.0012</b> | <b>***0.0028</b> | <b>*0.0119</b>   | <b>*0.0326</b>   |
| CoPoP/PHAD vs. ISA720                            | 0.9823 | 0.402  | 0.3424 | *0.0159       | <b>***0.0002</b> | <b>***0.0003</b> | <b>***0.0016</b> | <b>***0.0037</b> |
| CoPoP vs. Alum                                   | 0.9823 | 0.8678 | 0.944  | 0.8528        | 0.7023           | 0.6951           | 0.6956           | 0.7235           |
| CoPoP vs. ISA720                                 | 0.9963 | 0.7507 | 0.8187 | 0.2995        | 0.2153           | 0.1911           | 0.2227           | 0.2094           |
| Alum vs. ISA720                                  | 0.9987 | 0.9954 | 0.9875 | 0.6985        | 0.7886           | 0.7565           | 0.8054           | 0.7596           |
| <b>Dunnett's multiple comparisons (p values)</b> |        |        |        |               |                  |                  |                  |                  |
| no vaccine vs. CoPoP/PHAD                        | 0.7231 | 0.1257 | 0.9694 | <b>*0.022</b> | <b>*0.0243</b>   | <b>*0.0106</b>   | <b>***0.0036</b> | <b>***0.0007</b> |
| no vaccine vs. CoPoP                             | 0.6291 | 0.3299 | 0.972  | 0.6535        | 0.9121           | >0.9999          | 0.6362           | 0.0999           |
| no vaccine vs. Alum                              | 0.4112 | 0.7791 | 0.7142 | 0.9972        | 0.2402           | 0.615            | 0.9999           | 0.6296           |
| no vaccine vs. ISA720                            | 0.4966 | 0.8975 | 0.5105 | 0.7563        | *0.0335          | 0.1131           | 0.66             | >0.9999          |

**Supplemental Table 4: Statistical analysis of challenge studies shown in Figure 4.**

| Figure 4A Comparisons                            | Day 1   | Day 2   | Day 3   | Day 4   | Day 5          | Day 6           | Day 7            | Day 8                | Day 9                | Day 10               | Day 11         | Day 12        | Day 13  | Day 14 |
|--------------------------------------------------|---------|---------|---------|---------|----------------|-----------------|------------------|----------------------|----------------------|----------------------|----------------|---------------|---------|--------|
| <b>Tukey's multiple comparisons (p values)</b>   |         |         |         |         |                |                 |                  |                      |                      |                      |                |               |         |        |
| 2000ng in AddaVax vs. 200ng in AddaVax           | 0.9313  | 0.983   | >0.9999 | >0.9999 | 0.9985         | 0.9996          | >0.9999          | >0.9999              | >0.9999              | >0.9999              | >0.9999        | 0.9972        | 0.9993  | 0.9366 |
| 2000ng in AddaVax vs. 200ng in CoPoP             | >0.9999 | 0.9967  | 0.8645  | 0.682   | 0.3156         | 0.0932          | <b>*0.0445</b>   | 0.0645               | 0.0511               | 0.0521               | <b>*0.0158</b> | <b>*0.088</b> | 0.1348  | 0.1286 |
| 2000ng in AddaVax vs. 20ng in CoPoP              | 0.5396  | 0.6273  | 0.7297  | 0.8804  | 0.865          | 0.6489          | 0.6135           | 0.6625               | 0.5235               | 0.5805               | 0.3174         | 0.2879        | 0.3275  | 0.5211 |
| 2000ng in AddaVax vs. 2ng in CoPoP               | 0.962   | >0.9999 | 0.9984  | >0.9999 | 0.9989         | 0.9896          | 0.8879           | 0.783                | 0.5688               | 0.614                | 0.2064         | 0.3833        | 0.3379  | 0.574  |
| 200ng in AddaVax vs. 200ng in CoPoP              | 0.8885  | 0.8558  | 0.8058  | 0.564   | 0.1218         | <b>*0.0334</b>  | <b>*0.0174</b>   | <b>*0.0468</b>       | <b>*0.0411</b>       | <b>*0.0349</b>       | <b>*0.0132</b> | 0.1244        | 0.1588  | 0.1671 |
| 200ng in AddaVax vs. 20ng in CoPoP               | 0.1234  | 0.2562  | 0.6554  | 0.791   | 0.5952         | 0.4036          | 0.4182           | 0.6233               | 0.5112               | 0.5179               | 0.3224         | 0.3979        | 0.3902  | 0.5799 |
| 200ng in AddaVax vs. 2ng in CoPoP                | 0.5105  | 0.9604  | 0.9943  | 0.9992  | 0.9606         | 0.9261          | 0.7458           | 0.7549               | 0.5591               | 0.553                | 0.2044         | 0.517         | 0.4025  | 0.6185 |
| 200ng in CoPoP vs. 20ng in CoPoP                 | 0.6182  | 0.8794  | 0.9998  | 0.9987  | 0.8974         | 0.7566          | 0.5676           | 0.6233               | 0.6898               | 0.6272               | 0.4652         | 0.9477        | 0.9772  | 0.7206 |
| 200ng in CoPoP vs. 2ng in CoPoP                  | 0.9818  | 0.9994  | 0.9771  | 0.7721  | 0.4596         | 0.2228          | 0.27             | 0.4876               | 0.6422               | 0.5917               | 0.6382         | 0.8787        | 0.9737  | 0.7206 |
| 20ng in CoPoP vs. 2ng in CoPoP                   | 0.9442  | 0.7153  | 0.9171  | 0.9338  | 0.965          | 0.9188          | 0.9933           | >0.9999              | >0.9999              | >0.9999              | 0.9983         | 0.9995        | >0.9999 | 0.9366 |
| <b>Dunnett's multiple comparisons (p values)</b> |         |         |         |         |                |                 |                  |                      |                      |                      |                |               |         |        |
| Control vs. 2000ng in AddaVax                    | 0.5112  | 0.9674  | 0.9997  | 0.9916  | 0.8973         | 0.7792          | 0.4118           | 0.0952               | <b>*0.0258</b>       | <b>**0.0042</b>      |                |               |         |        |
| Control vs. 200ng in AddaVax                     | 0.1062  | 0.605   | 0.9965  | 0.9996  | 0.9929         | 0.916           | 0.4963           | 0.0699               | <b>*0.0163</b>       | <b>**0.0031</b>      |                |               |         |        |
| Control vs. 200ng in CoPoP                       | 0.5974  | 0.9999  | 0.8263  | 0.2371  | <b>*0.0224</b> | <b>**0.0024</b> | <b>***0.0002</b> | <b>****&lt;.0001</b> | <b>****&lt;.0001</b> | <b>****&lt;.0001</b> |                |               |         |        |
| Control vs. 20ng in CoPoP                        | 0.9972  | 0.7797  | 0.6532  | 0.4336  | 0.1917         | 0.0528          | <b>*0.0123</b>   | <b>**0.0025</b>      | <b>***0.0005</b>     | <b>***0.0002</b>     |                |               |         |        |
| Control vs. 2ng in CoPoP                         | 0.9674  | 0.9909  | 0.9997  | 0.9666  | 0.6242         | 0.3319          | <b>*0.0423</b>   | <b>**0.0041</b>      | <b>**0.0006</b>      | <b>***0.0002</b>     |                |               |         |        |
